# Supplementary material
Source: publisher site journal article supplement (https://www.dovepress.com/article/504148)
Supplement: Supplementary file 1 [file get_supplementary_file.php]

**Supporting information**

**Tumor microenvironment responsive and platelet membrane coated polydopamine nanoparticles for cancer radiosensitization by inducing cuproptosis**

Le Xin1, Shipeng Ning2, Hongwei Wang1,3*, Runze Shi4*

1 Department of General Surgery, Longgang Central Hospital of Shenzhen, Shenzhen, China.

2 Department of Breast Surgery, the Second Affiliated Hospital of Guangxi Medical University, Nanning, Guangxi, 530031, China.

3 Department of General Surgery, Guangdong Provincial Key Laboratory of Precision Medicine for Gastrointestinal Tumor, Nanfang Hospital, Southern Medical University, Guangzhou, Guangdong, 510515, China.

4 The Second Ward of Breast Surgery, Cancer Hospital Affiliated to Harbin Medical University, Harbin, China.

*Corresponding author: Hongwei Wang (360873476@qq.com); Runze Shi (shirz@hrbmu.edu.cn)

**Materials and methods**

Chemicals: Copper (II) chloride dihydrate (CuCl2, 99.99%) Dopamine hydrochloride (DA, 98%) and NH3·H2O (28%) were obtained from Aladdin (China). All of the aqueous solutions were prepared using purified deionized (DI) water purified with a purification system (Direct-Q3, Millipore, USA). The other solvents used in this work were purchased from Sinopharm Chemical Reagent (China) and Aladdin-Reagent (China).

Synthetic method and characterization of PDA@Cu, RC and PC: 130 mg of DA and 60 mg CuCl2 were dispersed to form a stable solution and stirred for 1 h at room temperature. Next, 900 μL of NH3·H2O was added to this solution and stirred for 5 h. The precipitate was collected by centrifugation and washed for several times. Finally, PDA@Cu nanoparticles (NPs) were obtained by freeze-drying the product overnight.

To prepare PC, whole blood samples were collected from female BALB/c mice aged 6 weeks. Then the platelet cells were obtained from whole blood samples by centrifugation. Next, the platelet cell membrane (PCM) was acquired via a freeze–thaw process method. To be more specifically, PM suspension was frozen at 80 ℃, followed by thawing at room temperature. The process was repeated for several times. Then the precipitates collected by centrifugation and suspended in PBS buffer containing protease inhibitors with sonification. Next, PM and PDA@Cu were mixed at a membrane protein-to-NPs ratio of 1:1 (w/w) under sonification to obtain PC. RC NPs were prepared using similar methods with erythrocyte membranes.

Cu release profile: To study the Cu release behavior, PC (100 μg/mL) was placed in sealed dialysis bag and immersed in PBS buffer at different pH values. The mixture was then kept at 37 °C under stirring. The samples of PBS buffer were collected at various time point. Then inductively coupled plasma atomic emission spectroscopy (ICP-AES) was used for Cu content measurements.

Cell culture: 4T1, CT26 and MCF-10A cells were obtained from purchased from the American Type Culture Collection (ATCC). 4T1, CT26 and MCF-10A cells were cultured in RPMI 1640 with 10% fetal bovine serum in a humidified incubator at 37 °C with 5% CO2 atmosphere.

4T1 cellular uptake: To investigate the cellular uptake of RC and PC. First, FITC was applied to label RC and PC. 4T1 cells were seeded into confocal dishes at a density of 5×104 cells and cultured overnight. Then 100 μL of FITC labeled RC and PC was added into the cells. After incubation for 2 h, the cell medium was removed and cells were rinsed for several times. The cell nuclei were stained using DAPI. Finally, confocal laser scanning microscopy (CLSM) was used for cells imaging.

Intracellular ROS levels and DNA damage levels: 4T1 cells was seeded in confocal dishes and after incubation overnight, cells were divided into 5 groups and treated with PBS, RT, PC, RC+RT or PC+RT respectively. RC or PC with Cu concentration of 30 μg/mL was added and the ionization irradiation was delivered using a small animal accelerator at a dosage of 4 Gy.

ROS detection kit (DCFH-DA probe) was used to visualize the intracellular ROS production and DAPI was applied for cell nuclei observation. Then the green fluorescence was observed using CLSM.

For DNA damage observation, after various treatments, cells were fixed using 4% PFA followed by rinse for several times using PBS buffer. After treatment with Triton X-100, cells were blocked and stained with the γ-H2AX antibody followed by DAPI for nuclear staining. CLSM was applied for observation of fluorescence intensity.

In vitro cytotoxicity: To evaluate the cytocompatibility, MCF-10A cells were seeded into 96-well plates. After overnight incubation, medium was replaced with fresh medium containing different concentrations of RC or PC. After 24 h incubation, CCK8 was added to each well and a microplate reader was used for absorbance measurements.

Cell viability assessment: CT26 cells were seeded into 96-well plates and incubated overnight. Then the cells were divided 5 groups and treated with PBS, RT, PC, RC+RT or PC+RT respectively. RC or PC with Cu concentration of 30 μg/mL and dosage of RT was 4 Gy. Then cell viability was assessed using a CCK8 kit after 24 h.

Western blot: After various treatments, cells in each group were collected and normalized to equivalent protein concentrations using a Pierce BCA protein assay kit. Equal amounts of protein were electrophoretically separated using a 10 % gel at 100 V. Coomassie brilliant blue R-250 was used to stain the gel. To detect the specific proteins, the proteins on the gel were transferred to polyvinylidene fluoride (PVDF) membranes. The membrane was blocked in 5 % skim milk for 2 h, followed by incubation with primary antibody and second antibody FDX1. After removal of excessive antibody, chemiluminescence imaging was used for to visualize the expression level of FDX1.

Drug distribution in vivo: To determine the biodistribution of RC and PC in vivo, mice with 200 mm3 tumors were administrated with RC and PC respectively. After 24 h, mice were sacrificed. Main organs and tumors were harvested and digested with aqua regia. Cu content in each solution was measured using ICP-AES.

Anti-tumor efficacy in subcutaneous: Animal experiments were conducted following the guidelines of the National Institutes of Health and approved by the Animal Ethics Committee of Guangxi Medical University (Approval number: 2023-KY (0932)). 105 4T1 cells was subcutaneously injected on the right lap of 6-week-old female BALB/c mice to form tumor models. After tumor volume reached approximately 200 mm3, mice were divided into 5 groups and treated with PBS, RT, PC, RC+RT or PC+RT. Mice received 100 μL RC or PC with Cu concentration of 2 mM injection through tail vein. The ionization irradiation was delivered using a small animal accelerator at a dosage of 4 Gy. Tumor volume and body weight in all groups was monitored every 3rd day. All mice were sacrificed at day 18. Tumors were harvested for hematoxylin-eosin (H&E) staining, immunohistochemical staining for LIAS and FDX1.

Statistical analysis: 3 duplicates were conducted for in vitro experiments and 5 duplicates were conducted for in vivo experiments. All data were shown as mean SD. statistical significance was displayed by two-sided unpaired *Student’s t test*.


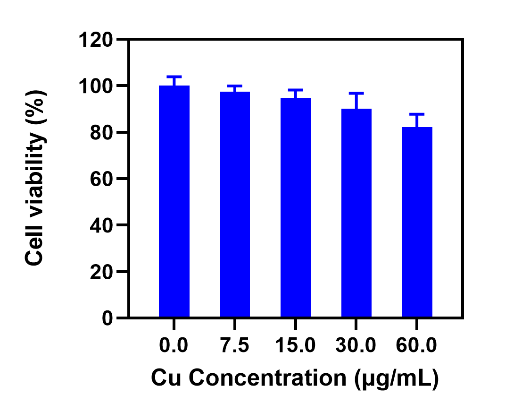


Figure S1. Cell cytotoxicity on MCF-10A cells.


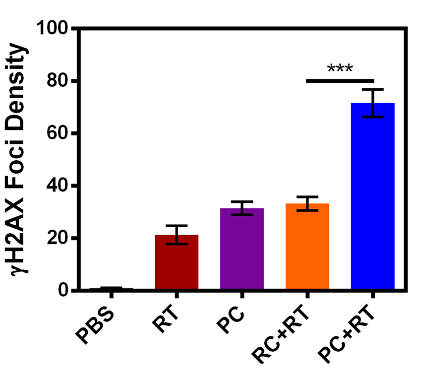


Figure S2. Quantification of γ-H2AX fluorescence intensity.
